# Supplementary material for: Protecting enzymes against heat inactivation by temperature-sensitive polymer in confined space
Source: Royal Society of Chemistry journal article supplement (doi:10.1039/c1cp21438a), 2011-01-01
Supplement: c1cp21438a.pdf [file c1cp21438a.pdf]

## ***Supplementary Information***

### **Protecting Enzyme against Heat Inactivation by Temperature-sensitive**

#### **Polymer in Confined Space**

Qian Tao, Ang Li, Xue Liu, Rujiang Ma, Yingli An, Linqi Shi\*

#### **1. Calculation of the number of CAB molecules and microemulsion droplets**

The number of CAB molecules could be determined by:

$$N_{\text{CAB}} = N_{\text{A}} C_{\text{CAB}} V / M \quad (1)$$

Where  $N_{\text{A}}$  denotes Avogadro's number.  $C_{\text{CAB}}$  is the mass concentration of CAB in the water phase of microemulsion,  $V$  is the volume of the water phase and  $M$  is the molecular weight of CAB.

The number of microemulsion droplets could be determined by:

$$N_{\text{droplet}} = V_{\text{water phase}} / V_{\text{droplet}} = V_{\text{water phase}} / \left( \frac{4}{3} \pi R_{\text{h}}^3 \right). \quad (2)$$

Where  $R_{\text{h}}$  is hydrodynamic radius of microemulsion droplets, which could be measured by DLS.

Taking CAB@E where CAB concentration is 0.016 mg/mL in microemulsion (0.14 mg/mL in water phase) for example, the number of CAB molecules in the whole microemulsion is approximately  $2.91 \times 10^{15}$ , and the number of microemulsion droplets is approximately  $1.70 \times 10^{18}$  at 20 °C and  $7.27 \times 10^{17}$  at 70 °C respectively (the volume of the water phase of one microemulsion sample is 1 mL).

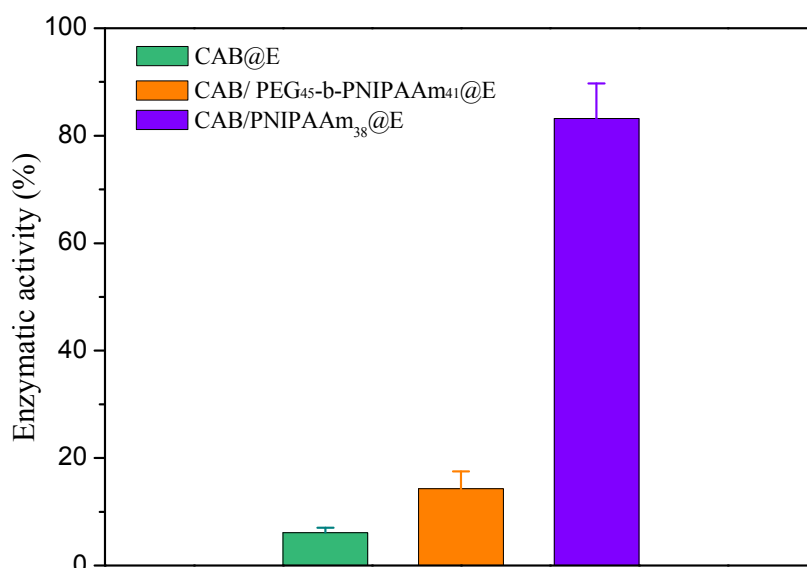

**Figure S1.** Residual enzymatic activity of free CAB and CAB with PEG<sub>45</sub>-b-PNIPAAm<sub>41</sub> or PNIPAAm<sub>38</sub> in microemulsion after heat treatment, Concentrations of CAB, PEG<sub>45</sub>-b-PNIPAAm<sub>41</sub> and PNIPAAm<sub>38</sub> are 0.016, 0.51 and 0.32 mg/mL respectively.

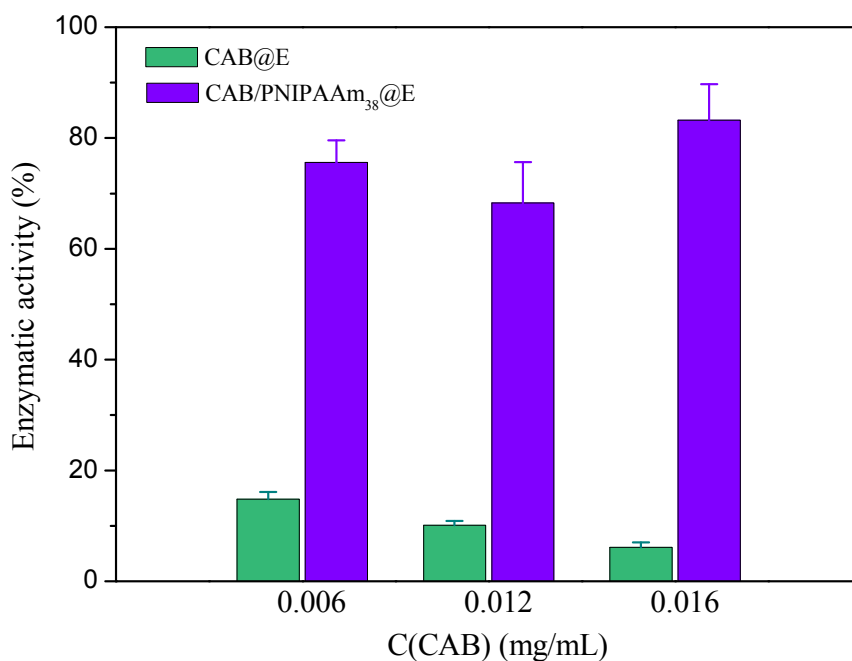

**Figure S2.** Residual enzymatic activity of free CAB and CAB with PNIPAAm<sub>38</sub> after heat treatment at CAB concentrations of 0.006, 0.012, 0.016 mg/mL in microemulsion, determined by comparison to enzymatic activity of native CAB@E of the identical concentration in microemulsion respectively. Concentration of PNIPAAm<sub>38</sub> is 0.32 mg/mL in microemulsion.
